# Supplementary material for: Electronic structure and second-order nonlinear optical properties of linear [3]spirobifluorenylene compounds
Source: Royal Society of Chemistry journal article supplement (doi:10.1039/d0nj02454f), 2020-01-01
Supplement: d0nj02454f1.pdf [file d0nj02454f1.pdf]

# Electronic structure and second-order nonlinear optical properties of linear [3]spirobifluorenylene compounds

Author: Li-jing Gong,\*‡ Cheng Ma,‡ Chun-ping Li, Jin-kai Lv, Xiang-yu Zhang

*Aviation University of Air Force, Changchun 130022, China*

## Contents

| Index                                                                                                                                                                                 | Page |
|---------------------------------------------------------------------------------------------------------------------------------------------------------------------------------------|------|
| 1.The selected bond lengths for compound <b>1</b> between experiment and calculation.....                                                                                             | S2   |
| 2. The computed absorption wavelengths ( $\lambda$ , nm) using the B3LYP functional at the different basis sets level for compound <b>1</b> along with the experimental values.....   | S3   |
| 3. The computed absorption wavelengths ( $\lambda$ , nm) using the different functionals at 6-31G(d, p) basis set level for compound <b>1</b> along with the experimental values..... | S3   |

**Table S1.** The selected bond lengths for compound **1** between experiment and calculation.

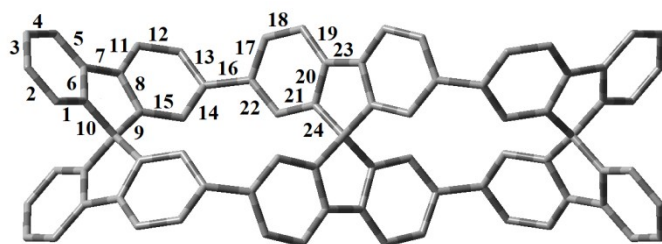

Optimized geometry of compound **1** (not show hydrogens)

| Bond      | B3LYP-D3 | Experiment ( | Difference |
|-----------|----------|--------------|------------|
| <b>1</b>  | 1.385    | 1.384        | 0.001      |
| <b>2</b>  | 1.399    | 1.394        | 0.005      |
| <b>3</b>  | 1.399    | 1.387        | 0.012      |
| <b>4</b>  | 1.397    | 1.384        | 0.013      |
| <b>5</b>  | 1.395    | 1.402        | -0.007     |
| <b>6</b>  | 1.409    | 1.404        | 0.005      |
| <b>7</b>  | 1.467    | 1.457        | 0.010      |
| <b>8</b>  | 1.411    | 1.415        | -0.004     |
| <b>9</b>  | 1.526    | 1.531        | -0.005     |
| <b>10</b> | 1.543    | 1.543        | 0.000      |
| <b>11</b> | 1.396    | 1.392        | 0.004      |
| <b>12</b> | 1.393    | 1.378        | 0.015      |
| <b>13</b> | 1.410    | 1.419        | -0.009     |
| <b>14</b> | 1.411    | 1.406        | 0.005      |
| <b>15</b> | 1.387    | 1.379        | 0.008      |
| <b>16</b> | 1.490    | 1.486        | 0.004      |
| <b>17</b> | 1.413    | 1.411        | 0.002      |
| <b>18</b> | 1.387    | 1.371        | 0.016      |

|           |       |       |        |
|-----------|-------|-------|--------|
| <b>19</b> | 1.394 | 1.394 | 0.000  |
| <b>20</b> | 1.406 | 1.396 | 0.010  |
| <b>21</b> | 1.391 | 1.376 | 0.015  |
| <b>22</b> | 1.412 | 1.412 | 0.000  |
| <b>23</b> | 1.456 | 1.451 | 0.005  |
| <b>24</b> | 1.540 | 1.555 | -0.015 |

**Note:** the difference is equal to calculation value minus experimental value

**Table S2.** The computed absorption wavelengths ( $\lambda$ , nm) using the B3LYP functional at the different basis sets level for compound **1** along with the experimental values.

| Basis set   | 6-31G(d,p) | 6-31+G(d) | 6-31+G(d,p) | Exp |
|-------------|------------|-----------|-------------|-----|
| $\lambda_1$ | 389.62     | 397.32    | 398.13      | 380 |
| $\lambda_2$ | 410.66     | 419.56    | 420.12      | 405 |

**Table S3.** The computed absorption wavelengths ( $\lambda$ , nm) in gas and solution (in parentheses) phases, using the different functionals at 6-31G(d, p) basis set level for compound **1** along with the experimental values.

| Functional  | B3LYP               | CAM-B3LYP | M06-2X | BH&HLYP | Exp |
|-------------|---------------------|-----------|--------|---------|-----|
| $\lambda_1$ | 389.62 (397.39<br>) | 341.00    | 340.65 | 345.74  | 380 |
| $\lambda_2$ | 410.66 (412.39<br>) |           |        |         | 405 |
